# Supplementary material
Source: PubMed Central journal article supplement (PMC8283665)
Supplement: jamaophthalmol-e212351-s001.pdf [file jamaophthalmol-e212351-s001.pdf]

## Supplementary Online Content

Bicket AK, Le JT, Azuara-Blanco A, et al. Minimally invasive glaucoma surgical techniques for open-angle glaucoma: an overview of Cochrane systematic reviews and network meta-analysis. *JAMA Ophthalmol*. Published online July 15, 2021. doi:10.1001/jamaophthalmol.2021.2351

**eTable 1.** Description of Included Cochrane Reviews

**eTable 2.** Overview of Reviews

**eTable 3.** Methodological Quality Assessed Using AMSTAR 2

**eTable 4.** Non-Cochrane Systematic Reviews of MIGS

**eReferences**

This supplementary material has been provided by the authors to give readers additional information about their work.

**eTable 1.** Description of included Cochrane reviews

| Cochrane review*      | Interventions      |                                       |                                                                               |                                                                                 | Comparison interventions                                                          | Outcomes (with data)                                                                                                                                                                                                                                                                                                                  | Number of RCTs included                                                        | Number and baseline description of participants (Intervention, Comparison)                                                                                                                              | Types of participants included                                                                                                        | Methodological quality assessed using AMSTAR 2 <sup>+</sup> |
|-----------------------|--------------------|---------------------------------------|-------------------------------------------------------------------------------|---------------------------------------------------------------------------------|-----------------------------------------------------------------------------------|---------------------------------------------------------------------------------------------------------------------------------------------------------------------------------------------------------------------------------------------------------------------------------------------------------------------------------------|--------------------------------------------------------------------------------|---------------------------------------------------------------------------------------------------------------------------------------------------------------------------------------------------------|---------------------------------------------------------------------------------------------------------------------------------------|-------------------------------------------------------------|
|                       | Device             | Manufacturer                          | Description of implanted device                                               | Description of procedure                                                        |                                                                                   |                                                                                                                                                                                                                                                                                                                                       |                                                                                |                                                                                                                                                                                                         |                                                                                                                                       |                                                             |
| Hu 2020 (MIGS01)      | Trabectome         | NeoMedix, Tustin, California, USA     | None                                                                          | Ab interno trabeculotomy (AIT) using electrocautery, irrigation, and aspiration | Cataract surgery with Trabectome compared to cataract surgery with trabeculectomy | Proportion of participants medication-free (not using eye drops)<br>Mean change in unmedicated IOP (after washout)<br>Mean change in number of IOP-lowering drops per day<br>Proportion of participants who required additional glaucoma procedures<br>Proportion of participants experiencing intra- or post-operative complications | 1 published [Ting 2018 <sup>1</sup> ]<br>1 ongoing [NCT03894631 <sup>2</sup> ] | 19<br><br>IOP**<br>20.0±5.3,<br>23.1±6.4<br><br>Drops<br>1.8±1.3,<br>1.4±1.1<br><br>Severity<br>Mild 30%,44%<br>Mod 60%, 33%<br>Sev 10%,22%                                                             | Persons aged 40-85 years with OAG (POAG or PXG) uncontrolled on maximal tolerated medical therapy, plus visually significant cataract | High                                                        |
| Otarola 2020 (MIGS02) | Hydrus® MicroStent | Ivantis Inc., Irvine, California, USA | Flexible crescent-shaped scaffold composed of nickel-titanium alloy (nitinol) | Ab interno insertion into Schlemm's canal                                       | Cataract surgery with Hydrus compared to cataract surgery alone                   | Proportion of participants medication-free (not using eye drops)<br>Mean change in unmedicated IOP (after washout)<br>Mean change in number of IOP-lowering drops per day<br>Proportion of participants who required additional glaucoma procedures<br>Proportion of participants experiencing intra- or post-operative complications | 2 published [HORIZON 2018 <sup>3,4</sup> , Pfeiffer 2015 <sup>5</sup> ]        | 619<br><br>IOP<br>25.5±3.0 (Hydrus),<br>25.4±2.9;<br>26.3±4.4,<br>26.6±4.2<br><br>Drops<br>1.7±0.9,<br>1.7±0.9;<br>2.0±1.0,<br>2.0±1.1<br><br>MD<br>-3.61±2.49,<br>-3.61±2.60;<br>-5.6±5.4,<br>-8.4±7.8 | Persons with cataract and mild to moderate OAG (POAG, PXG, or PG) controlled with medication, plus visually significant cataract      | High                                                        |
|                       |                    |                                       |                                                                               |                                                                                 | Hydrus compared to iStent trabecular                                              | Proportion of participants medication-free (not using eye drops)<br>Mean change in unmedicated IOP (after washout)                                                                                                                                                                                                                    | 1 published [COMPAR E 2019 <sup>6</sup> ]                                      | 148<br><br>IOP<br>27.5±4.4 (Hydrus),<br>27.3±4.2                                                                                                                                                        | Persons with cataract and mild to moderate OAG (POAG,                                                                                 |                                                             |

|                    |                                                       |                                                    |                                                                                      |                                                                                                                       |                                                                                                                                              |                                                                                                                                                                                                                                                                                                        |                                                                                                                   |                                                                                                                                                             |                                                                                             |      |
|--------------------|-------------------------------------------------------|----------------------------------------------------|--------------------------------------------------------------------------------------|-----------------------------------------------------------------------------------------------------------------------|----------------------------------------------------------------------------------------------------------------------------------------------|--------------------------------------------------------------------------------------------------------------------------------------------------------------------------------------------------------------------------------------------------------------------------------------------------------|-------------------------------------------------------------------------------------------------------------------|-------------------------------------------------------------------------------------------------------------------------------------------------------------|---------------------------------------------------------------------------------------------|------|
|                    |                                                       |                                                    |                                                                                      |                                                                                                                       | micro-bypass stent (2 stents)                                                                                                                | Mean change in number of IOP-lowering drops per day<br>Proportion of participants who required additional glaucoma procedures<br>Proportion of participants experiencing intra- or post-operative complications                                                                                        |                                                                                                                   | (2 iStents)<br><br>Drops<br>2.5±0.7,<br>2.7±0.8<br><br>MD<br>-6.2±5.4,<br>-6.2±6.5                                                                          | PXG, or PG) controlled with medication                                                      |      |
| Toth 2019 (MIGS03) | Endoscopic cyclophotocoagulation (ECP)                | BVI, Waltham, Massachusetts, USA                   | None                                                                                 | Ab interno destruction of ciliary epithelium using 810nm diode laser under direct visualization with a microendoscope | Cataract surgery with ECP compared to cataract surgery alone                                                                                 | Mean IOP (not otherwise specified)<br>Number of IOP-lowering drops (not otherwise specified)                                                                                                                                                                                                           | 1 ongoing [ChiCTR-TRC-14004233]                                                                                   | 50                                                                                                                                                          | Persons with primary angle closure glaucoma (PACG)                                          | High |
| King 2018 (MIGS04) | XEN® Gel Stent                                        | Allergan, Dublin, Ireland                          | Tissue-conforming tube implant composed of gelatin cross-linked with glutaraldehyde  | Ab interno insertion from anterior chamber through sclera and into subconjunctival space to create a bleb             | n/a                                                                                                                                          | n/a                                                                                                                                                                                                                                                                                                    | 0                                                                                                                 | n/a                                                                                                                                                         | n/a                                                                                         | High |
|                    | PreserFlo® MicroShunt (formerly: InnFocus MicroShunt) | Santen, Osaka, Japan                               | Flexible microshunt composed of poly(styrene-block-isobutylene-block-styrene) (SIBS) | Ab-externo radial insertion through subconjunctival scleral needle tract into anterior chamber to create a bleb       | InnFocus (now PreserFlo) compared to standard trabeculectomy                                                                                 | Proportion of participants achieving >20% decrease in diurnal IOP<br>Change in diurnal IOP                                                                                                                                                                                                             | 1 ongoing [NCT01881425]                                                                                           | 889                                                                                                                                                         | Persons aged 40-85 years with POAG with IOP 15-40 mmHg on maximal tolerated medical therapy |      |
| Le 2019 (MIGS05)   | iStent or iStent inject trabecular micro-bypass stent | Glaukos Corporation, Laguna Hills, California, USA | Heparin-coated, non-ferromagnetic titanium stent                                     | Ab interno insertion into Schlemm's canal                                                                             | Cataract surgery with iStent (1 stent in Fea 2010, Samuelson 2011; 2 stents in Fernandez-Barrientos 2010) compared to cataract surgery alone | Proportion of participants medication-free (not using eye drops)<br>Mean change in unmedicated IOP (after washout) – <i>Note: Washout note performed in Fea 2010.</i><br>Mean change in number of IOP-lowering drops per day<br>Proportion of participants who required additional glaucoma procedures | 4 published [Fea 2010 <sup>7-10</sup> , NCT00721968 <sup>11</sup> , Samuelson 2011 <sup>12-14</sup> , Fernandez - | 334<br><br>IOP<br>17.9±2.6,<br>17.3±3.0 <sup>**</sup> ;<br>25.4±3.6,<br>25.2±3.6;<br>24.2±1.8,<br>23.6±1.5<br><br>Drops<br>1.9±0.9,<br>1.8±0.7;<br>1.6±0.8, | Persons aged 48-89 with OHT or OAG (POAG, PXG, or PG), plus visually significant cataract   | High |

|                      |                     |                                        |                                                                           |                                                       |                                                                 |                                                                                                                                                                                                                                                     |                                                                         |                                                                                                                                                                  |                                                                                                           |      |
|----------------------|---------------------|----------------------------------------|---------------------------------------------------------------------------|-------------------------------------------------------|-----------------------------------------------------------------|-----------------------------------------------------------------------------------------------------------------------------------------------------------------------------------------------------------------------------------------------------|-------------------------------------------------------------------------|------------------------------------------------------------------------------------------------------------------------------------------------------------------|-----------------------------------------------------------------------------------------------------------|------|
|                      |                     |                                        |                                                                           |                                                       |                                                                 | Proportion of participants experiencing intra- or post-operative complications                                                                                                                                                                      | Barrientos 2010 <sup>15,16]</sup>                                       | 1.5±0.6;<br>1.1±0.5,<br>1.2±0.7<br><br>MD<br>-3.77±3.03,<br>-3.94±3.60<br>[Samuelson 2011 only]                                                                  |                                                                                                           |      |
|                      |                     |                                        |                                                                           |                                                       |                                                                 | iStent (2 stents, Vold 2016) or iStent inject (2 stents, Fea 2014) compared to medical therapy                                                                                                                                                      | 2 published [Vold 2016 <sup>17-19</sup> , Fea 2014 <sup>20,21]</sup>    | 286<br><br>IOP<br>25.5±2.5,<br>25.1±4.6**;<br>25.2±1.4,<br>24.8±1.7<br><br>Drops<br>0, 0; 1, 1<br><br>MD<br>-7.5±8.8,<br>-5.8±7.7 [Vold 2016 only]               | Persons with OHT or OAG (POAG, PXG, or PG) –<br><i>Note: Vold 2016 required participants to be phakic</i> |      |
|                      |                     |                                        |                                                                           |                                                       |                                                                 | Comparison of one vs. two vs. three iStents                                                                                                                                                                                                         | 1 published [Katz 2015 <sup>22-24]</sup>                                | 119<br><br>IOP<br>25.0±1.1,<br>25.0±1.7,<br>25.1±1.9<br><br>Drops<br>1.71±0.61,<br>1.76±0.54,<br>1.51±0.69<br><br>MD<br>-4.72±4.42,<br>-5.20±5.65,<br>-4.81±4.22 | Persons with OAG (POAG, PXG, or PG) and phakic                                                            |      |
| Sandhu 2020 (MIGS06) | Cypass® Micro-Stent | Alcon Laboratories, Basel, Switzerland | Fenestrated supraciliary micro-stent, composed of biocompatible polyimide | Ab interno radial insertion into suprachoroidal space | Cataract surgery with Cypass compared to cataract surgery alone | Proportion of participants medication-free (not using eye drops)<br>Mean change in unmedicated IOP (after washout)<br>Mean change in number of IOP-lowering drops per day<br>Proportion of participants who required additional glaucoma procedures | 1 published [Compass Trial <sup>25-27]</sup><br>1 ongoing [NCT01461278] | 505<br><br>IOP<br>24.4±2.8,<br>24.5±3.0<br><br>Drops<br>1.4±0.9,<br>1.3±1.0<br><br>MD                                                                            | Persons aged 45 with POAG and phakic                                                                      | High |

|  |              |                                                    |                                                                                |                                                       |     |                                                                                |   |                          |     |  |
|--|--------------|----------------------------------------------------|--------------------------------------------------------------------------------|-------------------------------------------------------|-----|--------------------------------------------------------------------------------|---|--------------------------|-----|--|
|  |              |                                                    |                                                                                |                                                       |     | Proportion of participants experiencing intra- or post-operative complications |   | -3.37±2.9,<br>-3.77±3.07 |     |  |
|  | iStent Supra | Glaukos Corporation, Laguna Hills, California, USA | Heparin-coated stent composed of polyethersulfone (PES) with a titanium sleeve | Ab interno radial insertion into suprachoroidal space | n/a | n/a                                                                            | 0 | n/a                      | n/a |  |

\* When multiple versions of a review were available, we included the most recent.

† Review results were assigned one of four AMSTAR 2 confidence levels: High, Moderate, Low, or Critically Low. A High level of confidence in the results of a review indicated no more than one non-critical weakness, while any critical weakness reduced the confidence level to Low.

\*\* Washout not performed

**eTable 2. Overview of Reviews**

| <b>MIGS 01: Ab interno trabecular bypass surgery with Trabectome for open angle glaucoma</b>                                                        |                                                         |                                                     |                                                                                                              |                                  |                                   |                                                                                                                                                                                                                                                           |
|-----------------------------------------------------------------------------------------------------------------------------------------------------|---------------------------------------------------------|-----------------------------------------------------|--------------------------------------------------------------------------------------------------------------|----------------------------------|-----------------------------------|-----------------------------------------------------------------------------------------------------------------------------------------------------------------------------------------------------------------------------------------------------------|
| Participants: Persons aged 40-85 years with OAG (POAG or PXG) uncontrolled on maximal tolerated medical therapy, plus visually significant cataract |                                                         |                                                     |                                                                                                              |                                  |                                   |                                                                                                                                                                                                                                                           |
| Intervention: Cataract surgery with Trabectome                                                                                                      |                                                         |                                                     |                                                                                                              |                                  |                                   |                                                                                                                                                                                                                                                           |
| Comparison: Cataract surgery with trabeculectomy with mitomycin-C                                                                                   |                                                         |                                                     |                                                                                                              |                                  |                                   |                                                                                                                                                                                                                                                           |
| Outcomes                                                                                                                                            | Anticipated absolute effect                             |                                                     | Relative effect (95% CI)<br>Intervention vs. Control                                                         | Number of participants (studies) | Certainty of the evidence (GRADE) | Comments                                                                                                                                                                                                                                                  |
|                                                                                                                                                     | Risk with trabeculectomy combined with cataract surgery | Risk with Trabectome combined with cataract surgery |                                                                                                              |                                  |                                   |                                                                                                                                                                                                                                                           |
| Proportion of participants medication-free (not using eye drops)<br><br>Follow-up: 6 months, MT                                                     | 6 months: 750 per 1000<br><br>MT: 500 per 1000          | 6 months: 667 per 1000<br><br>MT: 700 per 1000      | 6 months: RR 0.89 (0.48 to 1.64)<br><br>RR 1.40 (0.63 to 3.13)                                               | 19 (1)<br><br>18 (1)             | Very low <sup>1,2</sup>           | 1 participant was lost to follow-up after 3 months                                                                                                                                                                                                        |
| Mean change in medicated IOP (no washout performed)†<br><br>Follow-up: MT                                                                           | -6.4 ± 5.7 mmHg                                         | -2.7 ± 5.3 mmHg                                     | 3.7 (-1.44 to 8.84)                                                                                          | 18 (1)                           |                                   |                                                                                                                                                                                                                                                           |
| Mean change in number of IOP-lowering drops per day<br><br>Follow-up: MT                                                                            | -0.51 ± 0.81                                            | -0.92 ± 0.94                                        | -0.41 (-1.22 to 0.40)                                                                                        | 18 (1)                           | Very low <sup>1,2</sup>           |                                                                                                                                                                                                                                                           |
| Proportion of participants who required additional glaucoma procedures<br><br>Follow-up: MT                                                         | 0/9                                                     | 1/10                                                | RR 2.73 (0.12 to 59.57)                                                                                      | 19 (1)                           | Very low <sup>1,2</sup>           |                                                                                                                                                                                                                                                           |
| Proportion of participants experiencing intra- or post-operative complications<br><br>Follow-up: ST, MT                                             | ST: 8/9 (2 severe)<br><br>MT: 8/8 (0 severe)            | ST: 8/10 (0 severe)<br><br>MT: 8/10 (0 severe)      | ST: OR 0.50 (0.04, 6.68)<br>→ RR 0.90 (0.61, 1.32)<br><br>MT: OR 0.20 (0.01, 4.82)<br>→ RR 0.80 (0.59, 1.09) | 19 (1)<br><br>18 (1)             | Very low <sup>1,2</sup>           | Mild or moderate complications:<br>Peripheral anterior synechiae, day 1 IOP spike, hyphema, chronic-recurrent uveitis, steroid response, hypotony, bleb leak, choroidal effusion, encapsulated bleb.<br><br>Severe complications:<br>Hypotony maculopathy |
| <b>MIGS 02: Ab interno trabecular bypass surgery with Schlemm’s canal microstent (Hydrus) for open angle glaucoma</b>                               |                                                         |                                                     |                                                                                                              |                                  |                                   |                                                                                                                                                                                                                                                           |
| Participants: Persons with mild to moderate OAG (POAG, PXG, or PG) controlled with medication, plus visually significant cataract                   |                                                         |                                                     |                                                                                                              |                                  |                                   |                                                                                                                                                                                                                                                           |
| Intervention: Cataract surgery with Hydrus                                                                                                          |                                                         |                                                     |                                                                                                              |                                  |                                   |                                                                                                                                                                                                                                                           |

| Comparison: Cataract surgery alone                                                                                                                                             |                                                                                                                          |                                                                                                                          |                                                                                                                                                                            |                                  |                                   |                                                                                                                                                                                         |
|--------------------------------------------------------------------------------------------------------------------------------------------------------------------------------|--------------------------------------------------------------------------------------------------------------------------|--------------------------------------------------------------------------------------------------------------------------|----------------------------------------------------------------------------------------------------------------------------------------------------------------------------|----------------------------------|-----------------------------------|-----------------------------------------------------------------------------------------------------------------------------------------------------------------------------------------|
| Outcomes                                                                                                                                                                       | Anticipated absolute effect                                                                                              |                                                                                                                          | Relative effect (95% CI)                                                                                                                                                   | Number of participants (studies) | Certainty of the evidence (GRADE) | Comments                                                                                                                                                                                |
|                                                                                                                                                                                | Risk with cataract surgery alone                                                                                         | Risk with Hydrus combined with cataract surgery                                                                          |                                                                                                                                                                            |                                  |                                   |                                                                                                                                                                                         |
| Proportion of participants medication-free (not using eye drops)<br><br>Follow-up: MT, LT                                                                                      | MT: 502 per 1000<br><br>LT: 480 per 1000                                                                                 | MT: 804 per 1000<br><br>LT: 782 per 1000                                                                                 | MT: RR 1.59 (1.39 to 1.83)<br><br>LT: RR 1.63 (1.40 to 1.88)                                                                                                               | 639 (2)<br><br>619 (2)           | Moderate <sup>3</sup>             |                                                                                                                                                                                         |
| Mean change in unmedicated IOP (after washout) <sup>†</sup><br><br>Follow-up: LT                                                                                               | LT: -5.95 ± 4.2 mmHg                                                                                                     | LT: -7.95 ± 4.2                                                                                                          | LT: -2.0 (-2.69 to -1.31) mmHg                                                                                                                                             | 619 (2)                          | Moderate <sup>3</sup>             |                                                                                                                                                                                         |
| Mean change in number of IOP-lowering drops per day<br><br>Follow-up: LT                                                                                                       | LT: -0.76                                                                                                                | LT: -1.17                                                                                                                | LT: -0.41 (-0.56 to -0.27)                                                                                                                                                 | 619 (2)                          | Low <sup>3,4</sup>                |                                                                                                                                                                                         |
| Proportion of participants who required additional glaucoma procedures<br><br>Follow-up: LT                                                                                    | LT: 25 per 1000                                                                                                          | LT: 4 per 1000                                                                                                           | LT: RR 0.17 (0.03 to 0.86)                                                                                                                                                 | 619 (2)                          | Low <sup>3,5</sup>                |                                                                                                                                                                                         |
| Proportion of participants experiencing intra- or post-operative complications<br><br>Follow-up: LT                                                                            | Intraoperative: 0/236<br><br>Postoperative<br>Loss of 2+ VA lines: 7/236<br>IOP spike >10 mmHg: 7/236<br>Bleeding: 1/187 | Intraoperative: 7/417<br><br>Postoperative<br>Loss of 2+ VA lines: 5/417<br>IOP spike >10 mmHg: 4/417<br>Bleeding: 2/369 | Intraoperative: Not analyzed<br><br>Postoperative<br>Loss of 2+ VA lines: 0.46 (0.14 to 1.50)<br>IOP spike >10 mmHg: 0.39 (0.12 to 1.24)<br>Bleeding: 1.01 (0.09 to 11.11) | 619 (2)                          | Low <sup>3,5</sup>                | <u>Mild or moderate complications:</u><br>HypHEMA, IOP spike >10 mmHg<br><u>Severe complications:</u><br>Loss of 2+ lines of vision<br><br>Co-occurrence of complications not specified |
| Participants: Persons with mild to moderate OAG (POAG, PXG, or PG) controlled with medication, phakic or pseudophakic<br>Intervention: Hydrus<br>Comparison: iStent (2 stents) |                                                                                                                          |                                                                                                                          |                                                                                                                                                                            |                                  |                                   |                                                                                                                                                                                         |
| Outcomes                                                                                                                                                                       | Anticipated absolute effect (95% CI)                                                                                     |                                                                                                                          | Relative effect (95% CI)                                                                                                                                                   | Number of participants (studies) | Certainty of the evidence (GRADE) | Comments                                                                                                                                                                                |
|                                                                                                                                                                                | Risk with iStent                                                                                                         | Risk with Hydrus                                                                                                         |                                                                                                                                                                            |                                  |                                   |                                                                                                                                                                                         |
| Proportion of participants medication-free (not using eye drops)<br><br>Follow-up: MT                                                                                          | 240 per 1000                                                                                                             | 466 per 1000                                                                                                             | RR 1.94 (1.21 to 3.11)                                                                                                                                                     | 148 (1)                          | Low <sup>1</sup>                  | Large confidence intervals                                                                                                                                                              |
| Mean change in unmedicated IOP (after washout) <sup>†</sup>                                                                                                                    | -5.1 ± 2.9 mmHg                                                                                                          | -8.2 ± 3.7 mmHg                                                                                                          | -3.1 (-4.17 to -2.03) mmHg                                                                                                                                                 | 148 (1)                          | Moderate <sup>1</sup>             |                                                                                                                                                                                         |

| Follow-up: MT                                                                                                                                                                                                                                                            |                                                                                                 |                                                                                                 |                                                                                                                                |                                  |                                   |                                                                                                                        |
|--------------------------------------------------------------------------------------------------------------------------------------------------------------------------------------------------------------------------------------------------------------------------|-------------------------------------------------------------------------------------------------|-------------------------------------------------------------------------------------------------|--------------------------------------------------------------------------------------------------------------------------------|----------------------------------|-----------------------------------|------------------------------------------------------------------------------------------------------------------------|
| Mean change in number of IOP-lowering drops per day                                                                                                                                                                                                                      | -1.0 ± 1.2                                                                                      | -1.6 ± 1.2                                                                                      | -0.6 (-0.99 to -0.21)                                                                                                          | 148 (1)                          | Low <sup>1</sup>                  | Large confidence intervals                                                                                             |
| Follow-up: MT                                                                                                                                                                                                                                                            |                                                                                                 |                                                                                                 |                                                                                                                                |                                  |                                   |                                                                                                                        |
| Proportion of participants who required additional glaucoma procedures                                                                                                                                                                                                   | 0/74                                                                                            | 2/76                                                                                            | Not analyzed                                                                                                                   | 148 (1)                          | Very low <sup>1,2</sup>           |                                                                                                                        |
| Follow-up: MT                                                                                                                                                                                                                                                            |                                                                                                 |                                                                                                 |                                                                                                                                |                                  |                                   |                                                                                                                        |
| Proportion of participants experiencing intra- or post-operative complications                                                                                                                                                                                           | MT: 4/76 (1 severe)                                                                             | MT: 3/74 (2 severe)                                                                             | Not analyzed                                                                                                                   | 148 (1)                          | Low <sup>1,5</sup>                | <u>Mild or moderate complications:</u> IOP spike >10 mmHg<br><u>Severe complications:</u> Loss of 2+ lines of vision   |
| Follow-up: MT                                                                                                                                                                                                                                                            |                                                                                                 |                                                                                                 |                                                                                                                                |                                  |                                   |                                                                                                                        |
| <b>MIGS 03: Endoscopic cyclophotocoagulation (ECP) for open angle glaucoma and primary angle closure</b>                                                                                                                                                                 |                                                                                                 |                                                                                                 |                                                                                                                                |                                  |                                   |                                                                                                                        |
| No completed RCTs met inclusion criteria for this review.                                                                                                                                                                                                                |                                                                                                 |                                                                                                 |                                                                                                                                |                                  |                                   |                                                                                                                        |
| <b>MIGS 04: Subconjunctival draining minimally-invasive glaucoma devices for medically uncontrolled glaucoma</b>                                                                                                                                                         |                                                                                                 |                                                                                                 |                                                                                                                                |                                  |                                   |                                                                                                                        |
| No completed RCTs met inclusion criteria for this review; one RCT is ongoing.                                                                                                                                                                                            |                                                                                                 |                                                                                                 |                                                                                                                                |                                  |                                   |                                                                                                                        |
| <b>MIGS 05: Ab interno trabecular bypass surgery with iStent for open-angle glaucoma</b>                                                                                                                                                                                 |                                                                                                 |                                                                                                 |                                                                                                                                |                                  |                                   |                                                                                                                        |
| Participants: Persons aged 48-89 with OHT or OAG (POAG, PXG, or PG), plus visually significant cataract<br>Intervention: Cataract surgery with iStent (1 stent in Fea 2010, Samuelson 2011; 2 stents in Fernandez-Barrientos 2010)<br>Comparison: Cataract surgery alone |                                                                                                 |                                                                                                 |                                                                                                                                |                                  |                                   |                                                                                                                        |
| Outcomes                                                                                                                                                                                                                                                                 | Anticipated absolute effect (95% CI)                                                            |                                                                                                 | Relative effect (95% CI)                                                                                                       | Number of participants (studies) | Certainty of the evidence (GRADE) | Comments                                                                                                               |
|                                                                                                                                                                                                                                                                          | Risk with cataract surgery alone                                                                | Risk with iStent(s) combined with cataract surgery                                              |                                                                                                                                |                                  |                                   |                                                                                                                        |
| Proportion of participants medication-free (not using eye drops)                                                                                                                                                                                                         | 583 per 1000                                                                                    | 804 per 1000                                                                                    | RR 1.38 (1.18 to 1.63)                                                                                                         | 239 (2)                          | Very low <sup>3,5,6</sup>         |                                                                                                                        |
| Follow-up: MT                                                                                                                                                                                                                                                            |                                                                                                 |                                                                                                 |                                                                                                                                |                                  |                                   |                                                                                                                        |
| Mean change in unmedicated IOP (after washout) <sup>†</sup>                                                                                                                                                                                                              | ST: -4.3 ± 3.1 mmHg                                                                             | ST: -9.3 ± 4.1 mmHg                                                                             | ST: -5.0 (-7.47 to -2.53) mmHg                                                                                                 | 284 (3)                          | Very low <sup>3,5,6,7</sup>       | Study-specific estimates<br><sup>a</sup> Fea 2010; <sup>b</sup> Fernandez-Barrientos 2010; <sup>c</sup> Samuelson 2011 |
| Follow-up: ST, MT                                                                                                                                                                                                                                                        | MT*: -1.6 ± 3.2 mmHg <sup>a</sup> ; -3.9 ± 2.7 mmHg <sup>b</sup> ; -8.5 ± 4.3 mmHg <sup>c</sup> | MT*: -3.2 ± 3.0 mmHg <sup>a</sup> ; -6.6 ± 3.0 mmHg <sup>b</sup> ; -8.4 ± 3.6 mmHg <sup>c</sup> | MT*: -1.6 (-3.78 to 0.58) mmHg <sup>a</sup> ; -2.7 (-4.65 to -0.75) mmHg <sup>b</sup> ; 0.10 (-0.95 to 1.15) mmHg <sup>c</sup> |                                  |                                   |                                                                                                                        |
| Mean change in number of IOP-lowering drops per day                                                                                                                                                                                                                      | ST: 0.1±0.5                                                                                     | ST: 0.5±0.7                                                                                     | ST: -0.4 (-0.82 to 0.02)                                                                                                       | 315 (3)                          | Very low <sup>3,5,6</sup>         |                                                                                                                        |



| Follow-up: ST, MT                                                                                                                                      | MT: -1.0 to 0.9*                     | MT: -1.4 to 0.4*                | MT: -0.42 (range -0.6 to -0.23)                        |                                  |                                   |                                                                                                                                                                                          |
|--------------------------------------------------------------------------------------------------------------------------------------------------------|--------------------------------------|---------------------------------|--------------------------------------------------------|----------------------------------|-----------------------------------|------------------------------------------------------------------------------------------------------------------------------------------------------------------------------------------|
| Proportion of participants who required additional glaucoma procedures                                                                                 | 1/152                                | 1/138                           | Not analyzed                                           | 290 (3)                          | -                                 |                                                                                                                                                                                          |
| Follow-up: MT                                                                                                                                          |                                      |                                 |                                                        |                                  |                                   |                                                                                                                                                                                          |
| Proportion of participants experiencing intra- or post-operative complications                                                                         | 1/169                                | 1/165                           | RR 0.21 (0.07 to 0.67)<br>Not meta-analyzed            | 334 (4)                          | -                                 | Mild or moderate complications: IOP spike >10mmHg<br><br>Results from NCT00721968, reported for 12 to 48 months, not subdivided into shorter intervals                                   |
| Follow-up: MT to LT                                                                                                                                    |                                      |                                 |                                                        |                                  |                                   |                                                                                                                                                                                          |
| Participants: Persons with OHT or OAG (POAG, PXG, or PG)<br>Intervention: iStent (2 stents) or iStent inject (2 stents)<br>Comparison: Medical therapy |                                      |                                 |                                                        |                                  |                                   |                                                                                                                                                                                          |
| Outcomes                                                                                                                                               | Anticipated absolute effect (95% CI) |                                 | Relative effect (95% CI)                               | Number of participants (studies) | Certainty of the evidence (GRADE) | Comments                                                                                                                                                                                 |
|                                                                                                                                                        | Risk of medical therapy              | Risk of iStent or iStent inject |                                                        |                                  |                                   |                                                                                                                                                                                          |
| Proportion of participants medication-free (not using eye drops)                                                                                       | MT: 0/138                            | MT: 141/148<br>LT: 48/54        | Not analyzed                                           | 286 (2)                          | Very low <sup>2,3,6</sup>         | LT results from Vold 2016                                                                                                                                                                |
| Follow-up: MT, LT                                                                                                                                      |                                      |                                 |                                                        |                                  |                                   |                                                                                                                                                                                          |
| Mean change in IOP <sup>†</sup>                                                                                                                        |                                      |                                 | ST: 0.10 (-0.72 to 0.92)*<br>MT: -0.6 (-1.28 to 0.08)* | 184 (1)                          | Very low <sup>2,3,6</sup>         | Vold 2016 reported mean IOP (not change):<br>6 months: medical therapy 13.8, iStent 14.2<br>18 months: medical therapy 14.6, iStent 13.5<br>36 months: medical therapy 15.3, iStent 14.6 |
| Follow-up: ST, MT                                                                                                                                      |                                      |                                 |                                                        |                                  |                                   |                                                                                                                                                                                          |
| Proportion of participants who required additional glaucoma procedures                                                                                 | 0/138                                | 1/148                           | Not analyzed                                           | 286 (2)                          | -                                 | Fea 2014 reported 1 participant who required post-operative laser for stent obstruction                                                                                                  |
| Follow-up: MT                                                                                                                                          |                                      |                                 |                                                        |                                  |                                   |                                                                                                                                                                                          |
| Proportion of participants experiencing intra- or post-operative complications                                                                         | N/A                                  | MT: 2/286<br>LT: 1/286          | Not analyzed                                           | MT: 286 (2)<br>LT: 101 (1)       | -                                 | Mild or moderate complications:<br>HypHEMA, iridodialysis,<br>IOP spike >10mmHg                                                                                                          |
| Follow-up: MT, LT                                                                                                                                      |                                      |                                 |                                                        |                                  |                                   |                                                                                                                                                                                          |
| Participants: Persons with OAG (POAG, PXG, or PG) and phakic<br>Intervention: Two or three iStents                                                     |                                      |                                 |                                                        |                                  |                                   |                                                                                                                                                                                          |

| Comparison: One iStent                                                                                      |                                             |                                                                  |                                                                                                                                                                |                                  |                                   |                                                                                                          |
|-------------------------------------------------------------------------------------------------------------|---------------------------------------------|------------------------------------------------------------------|----------------------------------------------------------------------------------------------------------------------------------------------------------------|----------------------------------|-----------------------------------|----------------------------------------------------------------------------------------------------------|
| Outcomes                                                                                                    | Anticipated absolute effect (95% CI)        |                                                                  | Relative effect (95% CI)                                                                                                                                       | Number of participants (studies) | Certainty of the evidence (GRADE) | Comments                                                                                                 |
|                                                                                                             | Risk of 1 iStent                            | Risk of 2 or 3 iStents                                           |                                                                                                                                                                |                                  |                                   |                                                                                                          |
| Proportion of participants medication-free (not using eye drops)<br><br>Follow-up: ST, MT, LT               | ST: 35/38<br><br>MT: 33/37<br><br>LT: 15/33 | ST: 40/41; 39/40<br><br>MT: 37/41; 35/38<br><br>LT: 34/38; 35/38 | ST: RR 0.94 (0.53 to 1.05); RR 0.94 (0.53 to 1.05)<br>MT: RR 0.99 (0.85 to 1.15); RR 0.97 (0.84 to 1.12)<br>LT: RR 0.51 (0.34 to 0.75); RR 0.49 (0.34 to 0.73) | 119 (1)                          | -                                 |                                                                                                          |
| Mean change in unmedicated IOP (after washout) <sup>†</sup><br><br>Follow-up: MT                            | MT: -3.94 mmHg                              | MT: -5.99 mmHg; -8.19 mmHg                                       | MT: -1.80 mmHg (-2.43 to -1.17); -3.50 mmHg (-4.12 to -2.88)                                                                                                   | 119 (1)                          | -                                 | No difference between groups reported at 6 months (ST) or >36 months (LT)                                |
| Number of IOP-lowering drops per day<br><br>Follow-up: MT                                                   | MT: 1.0                                     | MT: 1.14                                                         | Not analyzed                                                                                                                                                   | 119 (1)                          | -                                 |                                                                                                          |
| Proportion of participants experiencing intra- or post-operative complications<br><br>Follow-up: >36 months | LT 0                                        | LT: 0                                                            | Not analyzed                                                                                                                                                   | 119 (1)                          | -                                 | At LT follow-up, cataract progression was noted in 12-21% of participants who received at least 1 iStent |
| <b>MIGS 06: Ab interno supraciliary microstent surgery for open angle glaucoma</b>                          |                                             |                                                                  |                                                                                                                                                                |                                  |                                   |                                                                                                          |
| Participants:<br>Intervention: Cataract surgery with Cypass<br>Comparison: Cataract surgery alone           |                                             |                                                                  |                                                                                                                                                                |                                  |                                   |                                                                                                          |
| Outcomes                                                                                                    | Anticipated absolute effect (95% CI)        |                                                                  | Relative effect (95% CI)                                                                                                                                       | Number of participants (studies) | Certainty of the evidence (GRADE) | Comments                                                                                                 |
|                                                                                                             | Risk with cataract surgery alone            | Risk with Cypass combined with cataract surgery                  |                                                                                                                                                                |                                  |                                   |                                                                                                          |
| Proportion of participants medication-free (not using eye drops)<br><br>Follow-up: MT                       | 591 per 1000                                | 848 per 1000                                                     | RR 1.27 (1.09 to 1.49)                                                                                                                                         | 448 (1)                          | Moderate <sup>3</sup>             |                                                                                                          |
| Mean change in unmedicated IOP (after washout) <sup>†</sup><br><br>Follow-up: MT                            | -5.4±3.9 mmHg                               | -7.4±4.4 mmHg                                                    | -2.30 mmHg (-3.00 to -1.60)                                                                                                                                    | 448 (1)                          | High                              |                                                                                                          |
| Mean change in number of IOP-lowering drops per day<br><br>Follow-up: MT                                    | -0.7                                        | -1.2                                                             | Not analyzed                                                                                                                                                   | 448 (1)                          | Moderate <sup>3</sup>             |                                                                                                          |

|                                                                                                                  |                                                                   |                                                                     |              |         |                       |                                                                                                                                                                                                                                                                             |
|------------------------------------------------------------------------------------------------------------------|-------------------------------------------------------------------|---------------------------------------------------------------------|--------------|---------|-----------------------|-----------------------------------------------------------------------------------------------------------------------------------------------------------------------------------------------------------------------------------------------------------------------------|
| Proportion of participants who required additional glaucoma procedures<br>Follow-up: MT                          | 31 per 1000                                                       | 8 per 1000                                                          | Not analyzed | 505 (1) | Moderate <sup>3</sup> | 4 participants required Cypass trimming                                                                                                                                                                                                                                     |
| Proportion of participants experiencing intra- or post-operative complications<br>Follow-up: MT, LT+ (60 months) | MT: 360 per 1000 (0 per 1000 severe)<br>LT+: (60 per 1000 severe) | MT: 390 per 1000 (11 per 1000 severe)<br>LT+: (112 per 1000 severe) | Not analyzed | 505 (1) | High                  | <u>Mild or moderate complications:</u><br>Hyphema, IOP spike >10 mmHg<br><u>Severe complications:</u><br>Loss of 2+ lines of vision<br><br>60 month data from NCT03273907 (FDA-mandated safety study), which also showed endothelial cell density reduction >30% in 27.16%. |

ST: Short-term (<6 months); MT: Medium-term (6 to 18 months); LT: Long-term (>18 to 36 months)

GRADE Working Group grades of evidence  
High-certainty: we are very confident that the true effect lies close to that of the estimate of the effect.  
Moderate-certainty: we are moderately confident in the effect estimate: the true effect is likely to be close to the estimate of the effect, but there is a possibility that it is substantially different.  
Low-certainty: our confidence in the effect estimate is limited: the true effect may be substantially different from the estimate of the effect.  
Very low-certainty: we have very little confidence in the effect estimate: the true effect is likely to be substantially different from the estimate of effect

<sup>1</sup> downgraded -1 level for serious limitations in study design  
<sup>2</sup> downgraded -2 level for imprecision  
<sup>3</sup> downgraded -1 for unclear or high risk of bias for blinding of outcome assessor  
<sup>4</sup>downgraded -1 for indirectness  
<sup>5</sup>downgraded -1 for imprecision  
<sup>6</sup>downgraded -1 for publication bias due to potential for industry influences  
<sup>7</sup>downgraded -1 for heterogeneity (e.g. I<sup>2</sup>>70%) or inconsistency across trials

\*subtotals only

† IOP measured using Goldmann applanation tonometry

**eTable 3. Methodological Quality Assessed using AMSTAR 2**

|                       | AMSTAR 2 Elements |     |     |     |     |     |     |     |     |     |     |     |     |     |     |     |
|-----------------------|-------------------|-----|-----|-----|-----|-----|-----|-----|-----|-----|-----|-----|-----|-----|-----|-----|
|                       | 1                 | 2   | 3   | 4   | 5   | 6   | 7   | 8   | 9   | 10  | 11  | 12  | 13  | 14  | 15* | 16  |
| Cochrane review       |                   |     |     |     |     |     |     |     |     |     |     |     |     |     |     |     |
| MIGS01 - Hu 2020      | YES               | YES | YES | YES | YES | YES | YES | YES | YES | YES | N/A | N/A | YES | N/A | N/A | YES |
| MIGS02 - Otarola 2020 | YES               | YES | YES | YES | YES | YES | N/A | YES | N/A | YES |
| MIGS03 - Toth 2019    | YES               | YES | YES | YES | YES | N/A | YES |
| MIGS04 - King 2018    | YES               | YES | YES | YES | YES | N/A | YES |
| MIGS05 - Le 2019      | YES               | YES | YES | YES | YES | YES | YES | YES | YES | YES | YES | YES | YES | YES | N/A | YES |
| MIGS06 - Sandhu 2020  | YES               | YES | YES | YES | YES | YES | N/A | YES | YES | YES | N/A | N/A | YES | N/A | N/A | YES |

Green = Yes; Yellow = Partial yes; Red = No; Grey = Not applicable ("N/A", e.g., no included studies, no meta-analysis, or too few studies for funnel plot)

\* AMSTAR-2 question #15 was not deemed relevant to any of the reviews, as the Cochrane Handbook advises against such testing for meta-analyses of fewer than 10 studies.<sup>28</sup>

AMSTAR Question 1: Did the research questions and inclusion criteria for the review include the components of PICO?

AMSTAR Question 2: Did the report of the review contain an explicit statement that the review methods were established prior to the conduct of the review and did the report justify any significant deviations from the protocol?

AMSTAR Question 3: Did the review authors explain their selection of the study designs for inclusion in the review?

AMSTAR Question 4: Did the review authors use a comprehensive literature search strategy?

AMSTAR Question 5: Did the review authors perform study selection in duplicate?

AMSTAR Question 6: Did the review authors perform data extraction in duplicate?

AMSTAR Question 7: Did the review authors provide a list of excluded studies and justify the exclusions?

AMSTAR Question 8: Did the review authors describe the included studies in adequate detail?

AMSTAR Question 9: Did the review authors use a satisfactory technique for assessing the risk of bias (RoB) in individual studies that were included in the review?

AMSTAR Question 10: Did the review authors report on the sources of funding for the studies included in the review?

AMSTAR Question 11: If meta-analysis was performed did the review authors use appropriate methods for statistical combination of results?

AMSTAR Question 12: Did the review authors assess the potential impact of RoB in individual studies on the results of the meta-analysis or other evidence synthesis?

AMSTAR Question 13: Did the review authors account for RoB in individual studies when interpreting/ discussing the results of the review?

AMSTAR Question 14: Did the review authors provide a satisfactory explanation for, and discussion of, any heterogeneity observed in the results of the review?

AMSTAR Question 15: If they performed quantitative synthesis did the review authors carry out an adequate investigation of publication bias (small study bias) and discuss its likely impact on the results of the review?

AMSTAR Question 16: Did the review authors report any potential sources of conflict of interest, including any funding they received for conducting the review?

**eTable 4.** Non-Cochrane Systematic Reviews of MIGS

| PMID     | Title                                                                                                                                                      | Year | Author                                                                                                     |
|----------|------------------------------------------------------------------------------------------------------------------------------------------------------------|------|------------------------------------------------------------------------------------------------------------|
| 30728930 | Comparing iStent versus CyPass with or without phacoemulsification in patients with glaucoma: a meta-analysis.                                             | 2019 | Fard MA., Patel SP., Pourafkari L., Nader ND.                                                              |
| 28850575 | Minimally-invasive glaucoma surgeries (MIGS) for open angle glaucoma: A systematic review and meta-analysis.                                               | 2017 | Lavia C., Dallorto L., Maule M., Ceccarelli M., Fea AM.                                                    |
| 29258404 | XEN Gel Implant: a new surgical approach in glaucoma                                                                                                       | 2018 | Chaudhary, A.; Salinas, L.; Guidotti, J.; Mermoud, A.; Mansouri, K.                                        |
| 26426659 | Comparison of Efficacy Between Endoscopic Cyclophotocoagulation and Alternative Surgeries in Refractory Glaucoma: A Meta-analysis                          | 2015 | Yang, Y.; Zhong, J.; Dun, Z.; Liu, X. A.; Yu, M.                                                           |
| 28740733 | When Is Evidence Enough Evidence? A Systematic Review and Meta-Analysis of the Trabectome as a Solo Procedure in Patients with Primary Open-Angle Glaucoma | 2017 | Chow, J. T. Y.; Hutnik, C. M. L.; Solo, K.; Malvankar-Mehta, M. S.                                         |
| NA       | iStent(R) for open angle glaucoma: Standard or emerging care?                                                                                              | 2017 | Asselin, G.; Drolet, R.; Toren, A.; Coulombe, M.; Rhainds, M.                                              |
| NA       | Glaucoma Schlemm's canal stent insertion: A systematic review                                                                                              | 2016 | Jo, S.                                                                                                     |
| 26018579 | iStent as a Solo Procedure for Glaucoma Patients: A Systematic Review and Meta-Analysis                                                                    | 2015 | Malvankar-Mehta, M. S.; Chen, Y. N.; Iordanous, Y.; Wang, W. W.; Costella, J.; Hutnik, C. M.               |
| 26147908 | iStent with Phacoemulsification versus Phacoemulsification Alone for Patients with Glaucoma and Cataract: A Meta-Analysis                                  | 2015 | Malvankar-Mehta, M. S.; Iordanous, Y.; Chen, Y. N.; Wang, W. W.; Patel, S. S.; Costella, J.; Hutnik, C. M. |
| 27413541 | iStent(R) Trabecular Microbypass Stent: An Update                                                                                                          | 2016 | Resende, A. F.; Patel, N. S.; Waisbourd, M.; Katz, L. J.                                                   |
| 30473602 | Efficacy and Adverse Event Profile of the iStent and iStent Inject Trabecular Micro-bypass for Open-angle Glaucoma: A Meta-analysis                        | 2018 | Popovic, M.; Campos-Moller, X.; Saheb, H.; Ahmed, I. I. K.                                                 |
| 30663456 | Cost-effectiveness analysis of standalone trabecular micro-bypass stents in patients with mild-to-moderate open-angle glaucoma in Canada                   | 2019 | Patel, V.; Ahmed, I.; Podbielski, D.; Falvey, H.; Murray, J.; Goeree, R.                                   |
| 26733487 | Review and meta-analysis of ab-interno trabeculectomy outcomes                                                                                             | 2016 | Kaplowitz, K.; Bussel, II; Honkanen, R.; Schuman, J. S.; Loewen, N. A.                                     |
| NA       | Novel glaucoma procedures: A report by the American Academy of ophthalmology                                                                               | 2011 | Francis, B. A.; Singh, K.; Lin, S. C.; Hodapp, E.; Jampel, H. D.; Samples, J. R.; Smith, S. D.             |

eReferences

1. Ting JLM, Rudnisky CJ, Damji KF. Prospective randomized controlled trial of phaco-trabectome versus phaco-trabeculectomy in patients with open angle glaucoma. *Can J Ophthalmol*. 2018;53(6):588-594. doi:10.1016/j.jcjo.2018.01.033
2. NCT03894631. Effect of intra-subject phaco/trabectome vs. phaco/kahook dualblade on intraocular pressure.

3. Jones J, Koch DD, Vold S, et al. Results from the United States cohort of the HORIZON trial of a Schlemm canal microstent to reduce intraocular pressure in primary open-angle glaucoma. *J Cataract Refract Surg*. 2019. doi:10.1016/j.jcrs.2019.03.024
4. Samuelson TW, Chang DF, Marquis R, et al. A Schlemm Canal Microstent for Intraocular Pressure Reduction in Primary Open-Angle Glaucoma and Cataract: The HORIZON Study. *Ophthalmology*. 2019. doi:10.1016/j.ophtha.2018.05.012
5. Pfeiffer N, Garcia-Feijoo J, Martinez-De-La-Casa JM, et al. A Randomized Trial of a Schlemm's Canal Microstent with Phacoemulsification for Reducing Intraocular Pressure in Open-Angle Glaucoma. *Ophthalmology*. 2015. doi:10.1016/j.ophtha.2015.03.031
6. Ahmed IK, Fea A, Au L, et al. A Prospective Randomized Trial Comparing Hydrus and iStent Microinvasive Glaucoma Surgery Implants for Standalone Treatment of Open-Angle Glaucoma: The COMPARE Study. *Ophthalmology*. 2020. doi:10.1016/j.ophtha.2019.04.034
7. Fea A, Lacroix G, Ghennadian S, Brogliatti B, Grignolo F. A Prospective, Randomized, Double Blind 15-Month Pilot Study on the Efficacy of Trabecular Stent (iStent) Implantation With Combined Phacoemulsification. *Am Acad Ophthalmol*. 2008.
8. Fea AM. Phacoemulsification versus phacoemulsification with micro-bypass stent implantation in primary open-angle glaucoma. Randomized double-masked clinical trial. *J Cataract Refract Surg*. 2010. doi:10.1016/j.jcrs.2009.10.031
9. Fea AM, Consolandi G, Zola M, et al. Micro-Bypass Implantation for Primary Open-Angle Glaucoma Combined with Phacoemulsification: 4-Year Follow-Up. *J Ophthalmol*. 2015. doi:10.1155/2015/795357
10. NCT00847158. A clinical trial of phacoemulsification versus phacoemulsification and the iStent implantation in POAG patients. [clinicaltrials.gov/ct2/show/NCT00847158](https://clinicaltrials.gov/ct2/show/NCT00847158). Published 2009.
11. NCT00721968. Safety and efficacy of the GTS400 stent in conjunction with cataract.
12. Craven RE, Katz JL, Wells JM, Giamporcaro JE. Cataract surgery with trabecular micro-bypass stent implantation in patients with mild-to-moderate open-angle glaucoma and cataract: Two-year follow-up. *J Cataract Refract Surg*. 2012;38(8):1339-1345. doi:10.1016/j.jcrs.2012.03.025
13. NCT00323284. A study of the trabecular micro-bypass stent in combination with cataract surgery in subjects with open angle glaucoma.
14. Samuelson TW, Katz LJ, Wells JM, Duh YJ, Giamporcaro JE. Randomized evaluation of the trabecular micro-bypass stent with phacoemulsification in patients with glaucoma and cataract. *Ophthalmology*. 2011. doi:10.1016/j.ophtha.2010.07.007
15. Fernández-Barrientos Y, García-Feijoo J, Martínez-de-la-Casa JM, Pablo LE, Fernandez-Perez C, Sanchez JG. Fluorophotometric study of the effect of the glaukos trabecular microbypass stent on aqueous humor dynamics. *Investig Ophthalmol Vis Sci*. 2010. doi:10.1167/iovs.09-3972
16. NCT00326066. A study of the iStent in combo with cataract surgery in newly diagnosed open angle glaucoma or OH patients. [clinicaltrials.gov/ct2/show/NCT00326066](https://clinicaltrials.gov/ct2/show/NCT00326066). Published 2006.

17. Vold SD, Voskanyan L, Tetz M, et al. Newly Diagnosed Primary Open-Angle Glaucoma Randomized to 2 Trabecular Bypass Stents or Prostaglandin: Outcomes Through 36 Months. *Ophthalmol Ther*. 2016. doi:10.1007/s40123-016-0065-3
18. Vold SD, Voskanyan L, Tetz M, et al. Erratum to: Newly Diagnosed Primary Open-Angle Glaucoma Randomized to 2 Trabecular Bypass Stents or Prostaglandin: Outcomes Through 36 Months. *Ophthalmol Ther*. 2016. doi:10.1007/s40123-016-0068-0
19. NCT01443988. Subjects with open-angle glaucoma, pseudoexfoliative glaucoma, or ocular hypertension naïve to medical and surgical therapy, treated with two trabecular micro-bypass stents (iStent) or travoprost.
20. Fea AM, Belda JJ, Rekas M, et al. Prospective unmasked randomized evaluation of the iStent inject® versus two ocular hypotensive agents in patients with primary open-angle glaucoma. *Clin Ophthalmol*. 2014. doi:10.2147/OPHTH.S59932
21. NCT00913029. Evaluation of the iStent versus two ocular hypotensive agents in patients with primary open-angle glaucoma (POAG) (SL).
22. Katz LJ, Erb C, Guillamet AC, et al. Prospective, randomized study of one, two, or three trabecular bypass stents in open-angle glaucoma subjects on topical hypotensive medication. *Clin Ophthalmol*. 2015. doi:10.2147/OPHTH.S96695
23. Katz LJ, Erb C, Carceller Guillamet A, et al. Long-term titrated IOP control with one, two, or three trabecular micro-bypass stents in open-angle glaucoma subjects on topical hypotensive medication: 42-month outcomes. *Clin Ophthalmol*. 2018. doi:10.2147/OPHTH.S152268
24. NCT01517477. One, two, or three iStents for the reduction of intraocular pressure in open-angle glaucoma subjects. [clinicaltrials.gov/ct2/show/NCT01517477](https://clinicaltrials.gov/ct2/show/NCT01517477). Published 2012.
25. Lass JH, Benetz BA, He J, et al. Corneal Endothelial Cell Loss and Morphometric Changes 5 Years after Phacoemulsification with or without CyPass Micro-Stent. *Am J Ophthalmol*. 2019. doi:10.1016/j.ajo.2019.07.016
26. Reiss G, Clifford B, Vold S, et al. Safety and Effectiveness of CyPass Supraciliary Micro-Stent in Primary Open-Angle Glaucoma: 5-Year Results from the COMPASS XT Study. *Am J Ophthalmol*. 2019. doi:10.1016/j.ajo.2019.07.015
27. Vold S, Ahmed IIK, Craven ER, et al. Two-Year COMPASS Trial Results: Supraciliary Microstenting with Phacoemulsification in Patients with Open-Angle Glaucoma and Cataracts. *Ophthalmology*. 2016. doi:10.1016/j.ophtha.2016.06.032
28. *Cochrane Handbook for Systematic Reviews of Interventions*.; 2019. doi:10.1002/9781119536604
